# Supplementary material for: Comprehensive evaluation of drought stress on medicinal plants: a meta-analysis
Source: PeerJ. 2024 Jul 22;12:e17801. doi: 10.7717/peerj.17801 (PMC11271654; doi:10.7717/peerj.17801)
Supplement: Supplemental Information 1 [file peerj-12-17801-s001.xlsx]

## Sheet: Yield
Ref No #	Reference	Plant Species	Yield Type	Stress Level	Mean	SD	N	Unit	Field/Pot
D1	Chrysargyris et. al. 2016	Lavender	Fresh	C	7.63	1.83848	8	g/plant	Greenhosue
D1	Chrysargyris et. al. 2016	Lavender	Fresh	M	4.46	1.15966	8	g/plant	Greenhosue
D1	Chrysargyris et. al. 2016	Lavender	Fresh	S	2.23	0.678823	8	g/plant	Greenhosue
D1	Chrysargyris et. al. 2016	Sage	Fresh	C	11.69	2.31931	8	g/plant	Greenhosue
D1	Chrysargyris et. al. 2016	Sage	Fresh	M	3.91	1.18794	8	g/plant	Greenhosue
D1	Chrysargyris et. al. 2016	Sage	Fresh	S	2.4	0.622254	8	g/plant	Greenhosue
D3	Aslani et all, 2023	Salvia officinalis	Dried	C	23.19	1.78401	3	g/pot	Greenhosue
D3	Aslani et all, 2023	Salvia officinalis	Dried	M	16.52	1.14315	3	g/pot	Greenhosue
D3	Aslani et all, 2023	Salvia officinalis	Dried	S	11.62	0.536936	3	g/pot	Greenhosue
D5	Celikcan et. al. 2021	Ocimum basilicum L.	Dried	C	0.77	0.069282	3	g/plant	Greenhosue
D5	Celikcan et. al. 2021	Ocimum basilicum L.	Dried	S	0.56	0.0866025	3	g/plant	Greenhosue
D6	RAHIMI et. al. 2023	Thymus vulgaris L.	Fresh	C	148.72	12.211	3	g/m2	Field
D6	RAHIMI et. al. 2023	Thymus vulgaris L.	Fresh	M	138.46	12.2629	3	g/m2	Field
D6	RAHIMI et. al. 2023	Thymus vulgaris L.	Fresh	S	91.02	8.87676	3	g/m2	Field
D7	Rahimi et. al. 2023	Ocimum basilicum genotypes	Fresh	C	11.79	2.52	154	g	Greenhosue
D7	Rahimi et. al. 2023	Ocimum basilicum genotypes	Fresh	M	9.81	2.13	154	g	Greenhosue
D7	Rahimi et. al. 2023	Ocimum basilicum genotypes	Fresh	S	7.28	1.65	154	g	Greenhosue
D10	ABDI et. al. 2019	Mentha × piperita L.	Fresh	C	161.5	12.4924	6	mg/leaf	Greenhosue
D10	ABDI et. al. 2019	Mentha × piperita L.	Fresh	M	134.8	17.1464	6	mg/leaf	Greenhosue
D10	ABDI et. al. 2019	Mentha × piperita L.	Fresh	S	125.2	14.6969	6	mg/leaf	Greenhosue
D10	ABDI et. al. 2019	Mentha × piperita L.	Dried	C	48.8	0.244949	6	mg/leaf	Greenhosue
D10	ABDI et. al. 2019	Mentha × piperita L.	Dried	M	42.2	3.91918	6	mg/leaf	Greenhosue
D10	ABDI et. al. 2019	Mentha × piperita L.	Dried	S	39.1	0.244949	6	mg/leaf	Greenhosue
D11	Karimi et. al. 2020	Salvia officinalis L.	Fresh	C	24.08	3.94	4	g	Greenhosue
D12	Karimi et. al. 2021	Salvia officinalis L.	Fresh	M	26.72	4.02	4	g	Greenhosue
D13	Karimi et. al. 2022	Salvia officinalis L.	Fresh	S	22.72	3.56	4	g	Greenhosue
D11	Karimi et. al. 2020	Salvia officinalis L.	Dried	C	10.48	8.34	4	g	Greenhosue
D12	Karimi et. al. 2021	Salvia officinalis L.	Dried	M	8.88	7.74	4	g	Greenhosue
D13	Karimi et. al. 2022	Salvia officinalis L.	Dried	S	7.07	5.08	4	g	Greenhosue
D14	Govahi et. al. 2015	Salvia officinalis L.	Dried	C	2.33	0.207846	3	t/ha	Field
D14	Govahi et. al. 2015	Salvia officinalis L.	Dried	M	1.35	0.155885	3	t/ha	Field
D14	Govahi et. al. 2015	Salvia officinalis L.	Dried	S	0.6	0.121244	3	t/ha	Field
D14	Govahi et. al. 2015	Salvia officinalis L.	Dried	C	1.17	0.155885	3	t/ha	Field
D14	Govahi et. al. 2015	Salvia officinalis L.	Dried	M	1.22	0.103923	3	t/ha	Field
D14	Govahi et. al. 2015	Salvia officinalis L.	Dried	S	0.53	0.103923	3	t/ha	Field
D14	Govahi et. al. 2015	Salvia officinalis L.	Dried	C	3.97	0.207846	3	t/ha	Field
D14	Govahi et. al. 2015	Salvia officinalis L.	Dried	M	3.09	0.155885	3	t/ha	Field
D14	Govahi et. al. 2015	Salvia officinalis L.	Dried	S	1.83	0.138564	3	t/ha	Field
D17-Year 1	Mulugeta et. al 2023	O. basilicum	Fresh	C	211.8	42.0888	3	g/plant	Greenhosue
D17-Year 1	Mulugeta et. al 2023	O. basilicum	Fresh	M	144.2	29.2717	3	g/plant	Greenhosue
D17-Year 1	Mulugeta et. al 2023	O. basilicum	Fresh	S	78.1	16.4545	3	g/plant	Greenhosue
D17-Year 2	Mulugeta et. al 2023	O. basilicum	Fresh	C	161	64.7787	3	g/plant	Greenhosue
D17-Year 2	Mulugeta et. al 2023	O. basilicum	Fresh	M	55.7	18.7061	3	g/plant	Greenhosue
D17-Year 2	Mulugeta et. al 2023	O. basilicum	Fresh	S	29.5	3.98372	3	g/plant	Greenhosue
D17-Year 1	Mulugeta et. al 2023	O. × africanum	Fresh	C	193	29.0985	3	g/plant	Greenhosue
D17-Year 1	Mulugeta et. al 2023	O. × africanum	Fresh	M	101.6	14.5492	3	g/plant	Greenhosue
D17-Year 1	Mulugeta et. al 2023	O. × africanum	Fresh	S	47.5	12.9904	3	g/plant	Greenhosue
D17-Year 2	Mulugeta et. al 2023	O. × africanum	Fresh	C	220.7	54.5596	3	g/plant	Greenhosue
D17-Year 2	Mulugeta et. al 2023	O. × africanum	Fresh	M	60.2	14.7224	3	g/plant	Greenhosue
D17-Year 2	Mulugeta et. al 2023	O. × africanum	Fresh	S	29.5	5.71577	3	g/plant	Greenhosue
D17-Year 1	Mulugeta et. al 2023	O. americanum	Fresh	C	228	32.3894	3	g/plant	Greenhosue
D17-Year 1	Mulugeta et. al 2023	O. americanum	Fresh	M	110	25.4611	3	g/plant	Greenhosue
D17-Year 1	Mulugeta et. al 2023	O. americanum	Fresh	S	42.6	27.1932	3	g/plant	Greenhosue
D17-Year 2	Mulugeta et. al 2023	O. americanum	Fresh	C	113.2	23.7291	3	g/plant	Greenhosue
D17-Year 2	Mulugeta et. al 2023	O. americanum	Fresh	M	53.7	9.87269	3	g/plant	Greenhosue
D17-Year 2	Mulugeta et. al 2023	O. americanum	Fresh	S	29.2	5.19615	3	g/plant	Greenhosue
D17-Year 1	Mulugeta et. al 2023	O. basilicum	Dried	C	63.5	11.0851	3	g/plant	Greenhosue
D17-Year 1	Mulugeta et. al 2023	O. basilicum	Dried	M	30.4	5.36936	3	g/plant	Greenhosue
D17-Year 1	Mulugeta et. al 2023	O. basilicum	Dried	S	13.9	2.59808	3	g/plant	Greenhosue
D17-Year 2	Mulugeta et. al 2023	O. basilicum	Dried	C	74.1	14.2028	3	g/plant	Greenhosue
D17-Year 2	Mulugeta et. al 2023	O. basilicum	Dried	M	16.5	4.33013	3	g/plant	Greenhosue
D17-Year 2	Mulugeta et. al 2023	O. basilicum	Dried	S	7.5	1.38564	3	g/plant	Greenhosue
D17-Year 1	Mulugeta et. al 2023	O. × africanum	Dried	C	35.9	6.9282	3	g/plant	Greenhosue
D17-Year 1	Mulugeta et. al 2023	O. × africanum	Dried	M	21.1	2.94449	3	g/plant	Greenhosue
D17-Year 1	Mulugeta et. al 2023	O. × africanum	Dried	S	9.8	2.77128	3	g/plant	Greenhosue
D17-Year 2	Mulugeta et. al 2023	O. × africanum	Dried	C	69	10.0459	3	g/plant	Greenhosue
D17-Year 2	Mulugeta et. al 2023	O. × africanum	Dried	M	20.7	7.62102	3	g/plant	Greenhosue
D17-Year 2	Mulugeta et. al 2023	O. × africanum	Dried	S	7.6	13.1636	3	g/plant	Greenhosue
D17-Year 1	Mulugeta et. al 2023	O. americanum	Dried	C	46.7	2.59808	3	g/plant	Greenhosue
D17-Year 1	Mulugeta et. al 2023	O. americanum	Dried	M	29.2	7.10141	3	g/plant	Greenhosue
D17-Year 1	Mulugeta et. al 2023	O. americanum	Dried	S	10.1	6.23538	3	g/plant	Greenhosue
D17-Year 2	Mulugeta et. al 2023	O. americanum	Dried	C	77.5	11.6047	3	g/plant	Greenhosue
D17-Year 2	Mulugeta et. al 2023	O. americanum	Dried	M	17.5	3.63731	3	g/plant	Greenhosue
D17-Year 2	Mulugeta et. al 2023	O. americanum	Dried	S	6.8	2.07846	3	g/plant	Greenhosue
D20	Bettaieb et. al. 2011	Cuminum cyminum L.	Fresh	C	4.16	0.69282	3	gram	Greenhosue
D20	Bettaieb et. al. 2011	Cuminum cyminum L.	Fresh	M	5.23	0.606218	3	gram	Greenhosue
D20	Bettaieb et. al. 2011	Cuminum cyminum L.	Fresh	S	2.73	0.381051	3	gram	Greenhosue
D20	Bettaieb et. al. 2011	Cuminum cyminum L.	Dried	C	1.2	0.398372	3	gram	Greenhosue
D20	Bettaieb et. al. 2011	Cuminum cyminum L.	Dried	M	1.62	0.311769	3	gram	Greenhosue
D20	Bettaieb et. al. 2011	Cuminum cyminum L.	Dried	S	0.74	0.0519615	3	gram	Greenhosue
D22	Mulugeta et. al. 2012	O. basilicum ’Ohre’	Fresh	C	389.56	221.607	2	g/plant	Field
D22	Mulugeta et. al. 2012	O. basilicum ’Ohre’	Fresh	M	284.72	188.882	2	g/plant	Field
D22	Mulugeta et. al. 2012	O. basilicum ‘Genovese’	Fresh	C	616.33	73.5532	2	g/plant	Field
D22	Mulugeta et. al. 2012	O. basilicum ‘Genovese’	Fresh	M	474.33	110.139	2	g/plant	Field
D22	Mulugeta et. al. 2012	O. × africanum	Fresh	C	268.33	168.192	2	g/plant	Field
D22	Mulugeta et. al. 2012	O. × africanum	Fresh	M	126.06	117.917	2	g/plant	Field
D22	Mulugeta et. al. 2012	O. americanum	Fresh	C	230.22	80.299	2	g/plant	Field
D22	Mulugeta et. al. 2012	O. americanum	Fresh	M	165.72	70.0743	2	g/plant	Field
D22	Mulugeta et. al. 2012	O. selloi	Fresh	C	114.78	62.9466	2	g/plant	Field
D22	Mulugeta et. al. 2012	O. selloi	Fresh	M	112	54.8856	2	g/plant	Field
D22	Mulugeta et. al. 2012	O. sanctum ‘Krishna’	Fresh	C	281	101.413	2	g/plant	Field
D22	Mulugeta et. al. 2012	O. sanctum ‘Krishna’	Fresh	M	250.33	141.209	2	g/plant	Field
D22	Mulugeta et. al. 2012	O. basilicum ’Ohre’	Dried	C	63.72	34.1674	2	g/plant	Field
D22	Mulugeta et. al. 2012	O. basilicum ’Ohre’	Dried	M	54.22	34.3371	2	g/plant	Field
D22	Mulugeta et. al. 2012	O. basilicum ‘Genovese’	Dried	C	115.83	16.9847	2	g/plant	Field
D22	Mulugeta et. al. 2012	O. basilicum ‘Genovese’	Dried	M	92.83	21.7647	2	g/plant	Field
D22	Mulugeta et. al. 2012	O. × africanum	Dried	C	50.61	26.9125	2	g/plant	Field
D22	Mulugeta et. al. 2012	O. × africanum	Dried	M	26.61	21.7647	2	g/plant	Field
D22	Mulugeta et. al. 2012	O. americanum	Dried	C	38.67	18.6111	2	g/plant	Field
D22	Mulugeta et. al. 2012	O. americanum	Dried	M	27.72	13.138	2	g/plant	Field
D22	Mulugeta et. al. 2012	O. selloi	Dried	C	29.17	9.05097	2	g/plant	Field
D22	Mulugeta et. al. 2012	O. selloi	Dried	M	25.33	10.7904	2	g/plant	Field
D22	Mulugeta et. al. 2012	O. sanctum ‘Krishna’	Dried	C	50	14.8351	2	g/plant	Field
D22	Mulugeta et. al. 2012	O. sanctum ‘Krishna’	Dried	M	45.5	21.3122	2	g/plant	Field
D24	Bayat and Moghadam 2019	Salvia nemorosa L. Isfahan	Dried	C	9.97	0.220454	6	g/pot	Greenhouse
D24	Bayat and Moghadam 2019	Salvia nemorosa L. Isfahan	Dried	S	6.21	0.293939	6	g/pot	Greenhouse
D24	Bayat and Moghadam 2019	Salvia nemorosa L. Violet Queen	Dried	C	9.53	0.489898	6	g/pot	Greenhouse
D24	Bayat and Moghadam 2019	Salvia nemorosa L. Violet Queen	Dried	S	6.11	0.367423	6	g/pot	Greenhouse
D24	Bayat and Moghadam 2019	Salvia nemorosa L. Rose Queen	Dried	C	7.31	0.293939	6	g/pot	Greenhouse
D24	Bayat and Moghadam 2019	Salvia nemorosa L. Rose Queen	Dried	S	3.91	0.220454	6	g/pot	Greenhouse
D25	Raznjoo et. al. 2008	Matricaria chamomila	Dried	C	188.8	12.5574	3	g/m2	Field
D25	Raznjoo et. al. 2008	Matricaria chamomila	Dried	M	108.4	3.81051	3	g/m2	Field
D25	Raznjoo et. al. 2008	Matricaria chamomila	Dried	S	67.2	2.13042	3	g/m2	Field
D25	Raznjoo et. al. 2008	Matricaria chamomila	Fresh	C	462.4	36.7195	3	g/m2	Field
D25	Raznjoo et. al. 2008	Matricaria chamomila	Fresh	M	294.4	19.7454	3	g/m2	Field
D25	Raznjoo et. al. 2008	Matricaria chamomila	Fresh	S	171.2	14.5492	3	g/m2	Field
D26	García-Caparrós et. al. 2019	L. Latifolia	Dried	C	0.5	0.1	4	Kg/m2	Field
D26	García-Caparrós et. al. 2019	L. Latifolia	Dried	M	0.34	0.08	4	Kg/m2	Field
D26	García-Caparrós et. al. 2019	M. piperita	Dried	C	0.33	0.06	4	Kg/m2	Field
D26	García-Caparrós et. al. 2019	M. piperita	Dried	M	0.3	0.06	4	Kg/m2	Field
D26	García-Caparrós et. al. 2019	S. lavandulifolia	Dried	C	0.15	0.02	4	Kg/m2	Field
D26	García-Caparrós et. al. 2019	S. lavandulifolia	Dried	M	0.16	0.02	4	Kg/m2	Field
D26	García-Caparrós et. al. 2019	S. sclarea	Dried	C	0.14	0.02	4	Kg/m2	Field
D26	García-Caparrós et. al. 2019	S. sclarea	Dried	M	0.14	0.02	4	Kg/m2	Field
D26	García-Caparrós et. al. 2019	T. capitatus	Dried	C	0.53	0.1	4	Kg/m2	Field
D26	García-Caparrós et. al. 2019	T. capitatus	Dried	M	0.5	0.1	4	Kg/m2	Field
D26	García-Caparrós et. al. 2019	T. mastichina	Dried	C	0.24	0.04	4	Kg/m2	Field
D26	García-Caparrós et. al. 2019	T. mastichina	Dried	M	0.25	0.04	4	Kg/m2	Field
D26	García-Caparrós et. al. 2019	L. Latifolia	Fresh	C	1.41	0.26	4	Kg/m2	Field
D26	García-Caparrós et. al. 2019	L. Latifolia	Fresh	M	0.84	0.12	4	Kg/m2	Field
D26	García-Caparrós et. al. 2019	M. piperita	Fresh	C	1.26	0.24	4	Kg/m2	Field
D26	García-Caparrós et. al. 2019	M. piperita	Fresh	M	0.92	0.18	4	Kg/m2	Field
D26	García-Caparrós et. al. 2019	S. lavandulifolia	Fresh	C	0.57	0.1	4	Kg/m2	Field
D26	García-Caparrós et. al. 2019	S. lavandulifolia	Fresh	M	0.63	0.1	4	Kg/m2	Field
D26	García-Caparrós et. al. 2019	S. sclarea	Fresh	C	0.71	0.14	4	Kg/m2	Field
D26	García-Caparrós et. al. 2019	S. sclarea	Fresh	M	0.7	0.14	4	Kg/m2	Field
D26	García-Caparrós et. al. 2019	T. capitatus	Fresh	C	1.57	0.22	4	Kg/m2	Field
D26	García-Caparrós et. al. 2019	T. capitatus	Fresh	M	1.8	0.22	4	Kg/m2	Field
D26	García-Caparrós et. al. 2019	T. mastichina	Fresh	C	0.78	0.12	4	Kg/m2	Field
D26	García-Caparrós et. al. 2019	T. mastichina	Fresh	M	0.81	0.14	4	Kg/m2	Field
D27	Hassanpour et. al. 2014	Mentha pulegium	Dried	C	4.72	0.44	4	mg/plant	Greenhosue
D27	Hassanpour et. al. 2014	Mentha pulegium	Dried	M	3.72	0.72	4	mg/plant	Greenhosue
D27	Hassanpour et. al. 2014	Mentha pulegium	Fresh	C	49.5	4.78	4	mg/plant	Greenhosue
D27	Hassanpour et. al. 2014	Mentha pulegium	Fresh	M	37.7	5.9	4	mg/plant	Greenhosue
D28	Begum et. al. 2021	Nicotiana tabacum	Dried	C	6.37	0.68	4	g/plant	Greenhosue
D28	Begum et. al. 2021	Nicotiana tabacum	Dried	M	4.78	0.74	4	g/plant	Greenhosue
D28	Begum et. al. 2021	Nicotiana tabacum	Dried	S	3.2	0.1	4	g/plant	Greenhosue
D28	Begum et. al. 2021	Nicotiana tabacum	Fresh	C	24.34	2.42	4	g/plant	Greenhosue
D28	Begum et. al. 2021	Nicotiana tabacum	Fresh	M	19.82	2.08	4	g/plant	Greenhosue
D28	Begum et. al. 2021	Nicotiana tabacum	Fresh	S	14.39	0.3	4	g/plant	Greenhosue
D30	Mohammadi et. al. 2018	Thymus vulgaris	Dried	C	1830.67	61.1414	3	kg/ha	Field
D30	Mohammadi et. al. 2018	Thymus vulgaris	Dried	M	1928.6	22.3435	3	kg/ha	Field
D31	Bistgani et. al. 2017	Thymus daenensis	Dried	C	35.8	14.6358	3	g/plant	Field
D31	Bistgani et. al. 2017	Thymus daenensis	Dried	M	22.53	11.0332	3	g/plant	Field
D31	Bistgani et. al. 2017	Thymus daenensis	Dried	S	15.83	10.1325	3	g/plant	Field
D31	Bistgani et. al. 2017	Thymus daenensis	Dried	C	51.86	26.2406	3	g/plant	Field
D31	Bistgani et. al. 2017	Thymus daenensis	Dried	M	47.1	25.9808	3	g/plant	Field
D31	Bistgani et. al. 2017	Thymus daenensis	Dried	S	23	19.2258	3	g/plant	Field
D33	Bettaieb et. al. 2011	Salvia officinalis L.	Fresh	C	19.53	2.1131	3	g	Greenhosue
D33	Bettaieb et. al. 2011	Salvia officinalis L.	Fresh	M	12.63	0.779423	3	g	Greenhosue
D33	Bettaieb et. al. 2011	Salvia officinalis L.	Fresh	S	4.96	0.069282	3	g	Greenhosue
D33	Bettaieb et. al. 2011	Salvia officinalis L.	Dried	C	4.48	0.103923	3	g	Greenhosue
D33	Bettaieb et. al. 2011	Salvia officinalis L.	Dried	M	3.68	0.034641	3	g	Greenhosue
D33	Bettaieb et. al. 2011	Salvia officinalis L.	Dried	S	3.3	0.034641	3	g	Greenhosue
D35	Habibi 2024	Aloe Vera L.	Fresh	C	550	82.0244	8	g	Greenhosue
D35	Habibi 2024	Aloe Vera L.	Fresh	M	526	98.9949	8	g	Greenhosue
D35	Habibi 2024	Aloe Vera L.	Fresh	S	352	107.48	8	g	Greenhosue
D35	Habibi 2024	Aloe Vera L.	Dried	C	45	17.5362	8	g	Greenhosue
D35	Habibi 2024	Aloe Vera L.	Dried	M	44	10.4652	8	g	Greenhosue
D35	Habibi 2024	Aloe Vera L.	Dried	S	32	9.05097	8	g	Greenhosue

## Sheet: Essential Oil Content
Ref No #	Reference	Plant Species	Stress Level	Mean	SD	N	Unit	Field/Greenhosue
D1	Chrysargyris et. al. 2016	Lavender	C	3.73	0.961665	8	%	Greenhouse
D1	Chrysargyris et. al. 2016	Lavender	M	3.78	0.59397	8	%	Greenhosue
D1	Chrysargyris et. al. 2016	Lavender	S	3.2	0.537401	8	%	Greenhosue
D1	Chrysargyris et. al. 2016	Sage	C	1.79	0.339411	8	%	Greenhosue
D1	Chrysargyris et. al. 2016	Sage	M	3.6	0.424264	8	%	Greenhosue
D1	Chrysargyris et. al. 2016	Sage	S	3.27	0.509117	8	%	Greenhosue
D2	Rahimi et. al. 2022	Thymus vulgaris L.	C	1.65	0.285788	3	%	Field
D2	Rahimi et. al. 2022	Thymus vulgaris L.	S	2.27	0.32909	3	%	Field
D3	Aslani et. al. 2023	Salvia officinalis	C	1.43	0.121244	3	%	Greenhosue
D3	Aslani et. al. 2023	Salvia officinalis	M	1.46	0.103923	3	%	Greenhosue
D3	Aslani et. al. 2023	Salvia officinalis	S	1.18	0.0519615	3	%	Greenhosue
D6	Rahimi et. al. 2023	Thymus vulgaris L.	C	2.29	0.225167	3	%	Field
D6	Rahimi et. al. 2023	Thymus vulgaris L.	M	2.61	0.190526	3	%	Field
D6	Rahimi et. al. 2023	Thymus vulgaris L.	S	1.97	0.190526	3	%	Field
D7	Rahimi et. al. 2023	Ocimum basilicum genotypes	C	1.37	0.65	154	%	Greenhosue
D7	Rahimi et. al. 2023	Ocimum basilicum genotypes	M	1.3	0.47	154	%	Greenhosue
D7	Rahimi et. al. 2023	Ocimum basilicum genotypes	S	1.13	0.36	154	%	Greenhosue
D11	Karimi et. al. 2020	Salvia officinalis L.	C	0.99	0.42	4	%	Greenhosue
D11	Karimi et. al. 2021	Salvia officinalis L.	M	1.12	0.58	4	%	Greenhosue
D11	Karimi et. al. 2022	Salvia officinalis L.	S	1.01	0.48	4	%	Greenhosue
D14	Govahi et. al. 2015	Salvia officinalis L.	C	0.49	0.0173205	3	%	Field
D14	Govahi et. al. 2015	Salvia officinalis L.	M	0.97	0.0173205	3	%	Field
D14	Govahi et. al. 2015	Salvia officinalis L.	S	0.78	0.034641	3	%	Field
D14	Govahi et. al. 2015	Salvia officinalis L.	C	1.12	0.034641	3	%	Field
D14	Govahi et. al. 2015	Salvia officinalis L.	M	2.42	0.121244	3	%	Field
D14	Govahi et. al. 2015	Salvia officinalis L.	S	2.18	0.103923	3	%	Field
D14	Govahi et. al. 2015	Salvia officinalis L.	C	1.07	0.034641	3	%	Field
D14	Govahi et. al. 2015	Salvia officinalis L.	M	2.19	0.121244	3	%	Field
D14	Govahi et. al. 2015	Salvia officinalis L.	S	1.95	0.103923	3	%	Field
D15	Imani et. al. 2023	Salvia Miryazanii	C	1.19	0.103923	3	%	Greenhosue
D15	Imani et. al. 2023	Salvia Miryazanii	M	1.5	0.129904	3	%	Greenhosue
D15	Imani et. al. 2023	Salvia Miryazanii	S	0.9	0.0779423	3	%	Greenhosue
D17-Year 1	Mulugeta et. al 2023	O. basilicum	C	0.6	0.173205	3	%	Greenhosue
D17-Year 1	Mulugeta et. al 2023	O. basilicum	M	0.6	0.173205	3	%	Greenhosue
D17-Year 1	Mulugeta et. al 2023	O. basilicum	S	0.7	0.173205	3	%	Greenhosue
D17-Year 2	Mulugeta et. al 2023	O. basilicum	C	0.5	0.173205	3	%	Greenhosue
D17-Year 2	Mulugeta et. al 2023	O. basilicum	M	0.6	0.173205	3	%	Greenhosue
D17-Year 2	Mulugeta et. al 2023	O. basilicum	S	0.7	0.173205	3	%	Greenhosue
D17-Year 1	Mulugeta et. al 2023	O. × africanum	C	2.8	0.519615	3	%	Greenhosue
D17-Year 1	Mulugeta et. al 2023	O. × africanum	M	3.3	0.519615	3	%	Greenhosue
D17-Year 1	Mulugeta et. al 2023	O. × africanum	S	3.7	1.38564	3	%	Greenhosue
D17-Year 2	Mulugeta et. al 2023	O. × africanum	C	3	0.173205	3	%	Greenhosue
D17-Year 2	Mulugeta et. al 2023	O. × africanum	M	3.1	0.173205	3	%	Greenhosue
D17-Year 2	Mulugeta et. al 2023	O. × africanum	S	3.8	0.519615	3	%	Greenhosue
D17-Year 1	Mulugeta et. al 2023	O. americanum	C	1.5	0.173205	3	%	Greenhosue
D17-Year 1	Mulugeta et. al 2023	O. americanum	M	1.6	0.519615	3	%	Greenhosue
D17-Year 1	Mulugeta et. al 2023	O. americanum	S	1.3	0.34641	3	%	Greenhosue
D17-Year 2	Mulugeta et. al 2023	O. americanum	C	0.6	0.173205	3	%	Greenhosue
D17-Year 2	Mulugeta et. al 2023	O. americanum	M	0.5	0	3	%	Greenhosue
D17-Year 2	Mulugeta et. al 2023	O. americanum	S	0.6	0	3	%	Greenhosue
D19	Amiri et. al. 2016	Pelargonium graveolens L.	C	0.12	0.0173205	3	%	Greenhosue
D19	Amiri et. al. 2016	Pelargonium graveolens L.	M	0.14	0.0173205	3	%	Greenhosue
D22	Mulugeta et. al. 2012	O. basilicum ’Ohre’	C	2.05	0.857321	6	%	Field
D22	Mulugeta et. al. 2012	O. basilicum ’Ohre’	M	2.04	0.367423	6	%	Field
D22	Mulugeta et. al. 2012	O. basilicum ‘Genovese’	C	0.66	0.195959	6	%	Field
D22	Mulugeta et. al. 2012	O. basilicum ‘Genovese’	M	0.78	0.146969	6	%	Field
D22	Mulugeta et. al. 2012	O. × africanum	C	3.72	0.367423	6	%	Field
D22	Mulugeta et. al. 2012	O. × africanum	M	4.14	0.832827	6	%	Field
D22	Mulugeta et. al. 2012	O. americanum	C	1.12	0.146969	6	%	Field
D22	Mulugeta et. al. 2012	O. americanum	M	1.2	0.220454	6	%	Field
D22	Mulugeta et. al. 2012	O. selloi	C	1.86	0.685857	6	%	Field
D22	Mulugeta et. al. 2012	O. selloi	M	2.64	0.220454	6	%	Field
D22	Mulugeta et. al. 2012	O. sanctum ‘Krishna’	C	0.85	0.0979796	6	%	Field
D22	Mulugeta et. al. 2012	O. sanctum ‘Krishna’	M	0.91	0.0734847	6	%	Field
D25	Razmjoo et. al. 2008	Matricaria chamomila	C	1.74	0.0138564	3	%	Field
D25	Razmjoo et. al. 2008	Matricaria chamomila	M	0.73	0.0103923	3	%	Field
D25	Razmjoo et. al. 2008	Matricaria chamomila	S	0.53	0.00173205	3	%	Field
D26	García-Caparrós et. al. 2019	L. Latifolia	C	28.49	4.02	4	mL/kg DW	Field
D26	García-Caparrós et. al. 2019	L. Latifolia	M	26.69	4.24	4	mL/kg DW	Field
D26	García-Caparrós et. al. 2019	M. piperita	C	22.18	3.76	4	mL/kg DW	Field
D26	García-Caparrós et. al. 2019	M. piperita	M	21.34	4.16	4	mL/kg DW	Field
D26	García-Caparrós et. al. 2019	S. lavandulifolia	C	24.14	4.36	4	mL/kg DW	Field
D26	García-Caparrós et. al. 2019	S. lavandulifolia	M	24.75	4.44	4	mL/kg DW	Field
D26	García-Caparrós et. al. 2019	S. sclarea	C	27.68	4.84	4	mL/kg DW	Field
D26	García-Caparrós et. al. 2019	S. sclarea	M	13.05	2.28	4	mL/kg DW	Field
D26	García-Caparrós et. al. 2019	T. capitatus	C	46.36	9.18	4	mL/kg DW	Field
D26	García-Caparrós et. al. 2019	T. capitatus	M	44.65	7.94	4	mL/kg DW	Field
D26	García-Caparrós et. al. 2019	T. mastichina	C	63.54	12.34	4	mL/kg DW	Field
D26	García-Caparrós et. al. 2019	T. mastichina	M	67.39	12.82	4	mL/kg DW	Field
D27	Hassanpour et. al. 2014	Mentha pulegium	C	1.19	0.39	4	%	Greenhosue
D27	Hassanpour et. al. 2014	Mentha pulegium	M	1.89	0.392	4	%	Greenhosue
D30	Mohammadi et. al. 2018	Thymus vulgaris	C	2.023	0.0519615	3	%	Field
D30	Mohammadi et. al. 2018	Thymus vulgaris	S	2.263	0.0207846	3	%	Field
D31-Year1	Bistgani et. al. 2017	Thymus daenensis	C	0.4	0.606218	3	%	Field
D31-Year1	Bistgani et. al. 2017	Thymus daenensis	M	0.71	0.606218	3	%	Field
D31-Year1	Bistgani et. al. 2017	Thymus daenensis	S	0.86	0.623538	3	%	Field
D31-Year2	Bistgani et. al. 2017	Thymus daenensis	C	2.07	0.917987	3	%	Field
D31-Year2	Bistgani et. al. 2017	Thymus daenensis	M	2.43	0.866025	3	%	Field
D31-Year2	Bistgani et. al. 2017	Thymus daenensis	S	3.17	0.727461	3	%	Field
D32	Bidabadi et. al. 2020	Salvia nemorosa L.	C	0.58	0.103923	3	%	Greenhouse
D32	Bidabadi et. al. 2020	Salvia nemorosa L.	M	0.75	0.0519615	3	%	Greenhouse
D32	Bidabadi et. al. 2020	Salvia nemorosa L.	S	0.43	0.0173205	3	%	Greenhouse
D32	Bidabadi et. al. 2020	Salvia reuterana Boiss.	C	0.49	0.034641	3	%	Greenhouse
D32	Bidabadi et. al. 2020	Salvia reuterana Boiss.	M	0.54	0.0173205	3	%	Greenhouse
D32	Bidabadi et. al. 2020	Salvia reuterana Boiss.	S	0.39	0.034641	3	%	Greenhouse

## Sheet: Esseential Oil Yield
Ref No #	Reference	Plant Species	Stress Level	Mean	SD	N	Unit	Field/Pot
D2	Rahimi et. al. 2022	Thymus vulgaris L.	C	0.78	0.0909327	3	g/plot	Field
D2	Rahimi et. al. 2022	Thymus vulgaris L.	S	0.52	0.0935307	3	g/plot	Field
D3	Aslani et all, 2023	Salvia officinalis	C	0.221	0.0199186	3	ml/pot	Greenhouse
D3	Aslani et all, 2023	Salvia officinalis	M	0.181	0.0155885	3	ml/pot	Greenhouse
D3	Aslani et all, 2023	Salvia officinalis	S	0.099	0.00866025	3	ml/pot	Greenhouse
D6	RAHIMI et. al. 2023	Thymus vulgaris L.	C	3.51	0.34641	3	g/m	Field
D6	RAHIMI et. al. 2023	Thymus vulgaris L.	M	3.68	0.381051	3	g/m	Field
D6	RAHIMI et. al. 2023	Thymus vulgaris L.	S	2.53	0.32909	3	g/m	Field
D14	Govahi et. al. 2015	Salvia officinalis L.	C	11.59	1.4376	3	l/ha	Field
D14	Govahi et. al. 2015	Salvia officinalis L.	M	13.18	2.00918	3	l/ha	Field
D14	Govahi et. al. 2015	Salvia officinalis L.	S	4.83	1.14315	3	l/ha	Field
D14	Govahi et. al. 2015	Salvia officinalis L.	C	20.1	2.35559	3	l/ha	Field
D14	Govahi et. al. 2015	Salvia officinalis L.	M	30.06	3.86247	3	l/ha	Field
D14	Govahi et. al. 2015	Salvia officinalis L.	S	11.93	2.75396	3	l/ha	Field
D14	Govahi et. al. 2015	Salvia officinalis L.	C	42.84	3.61999	3	l/ha	Field
D14	Govahi et. al. 2015	Salvia officinalis L.	M	68.65	6.99749	3	l/ha	Field
D14	Govahi et. al. 2015	Salvia officinalis L.	S	36.42	4.53797	3	l/ha	Field
D17-Year 1	Mulugeta et. al 2023	O. basilicum	C	0.3	0	3	ml/plant	Greenhouse
D17-Year 1	Mulugeta et. al 2023	O. basilicum	M	0.2	0	3	ml/plant	Greenhouse
D17-Year 1	Mulugeta et. al 2023	O. basilicum	S	0.1	0	3	ml/plant	Greenhouse
D17-Year 2	Mulugeta et. al 2023	O. basilicum	C	0.4	0	3	ml/plant	Greenhouse
D17-Year 2	Mulugeta et. al 2023	O. basilicum	M	0.1	0	3	ml/plant	Greenhouse
D17-Year 2	Mulugeta et. al 2023	O. basilicum	S	0.1	0	3	ml/plant	Greenhouse
D17-Year 1	Mulugeta et. al 2023	O. × africanum	C	0.9	0.34641	3	ml/plant	Greenhouse
D17-Year 1	Mulugeta et. al 2023	O. × africanum	M	0.6	0	3	ml/plant	Greenhouse
D17-Year 1	Mulugeta et. al 2023	O. × africanum	S	0.4	0	3	ml/plant	Greenhouse
D17-Year 2	Mulugeta et. al 2023	O. × africanum	C	2	0.173205	3	ml/plant	Greenhouse
D17-Year 2	Mulugeta et. al 2023	O. × africanum	M	0.6	0.173205	3	ml/plant	Greenhouse
D17-Year 2	Mulugeta et. al 2023	O. × africanum	S	0.3	0	3	ml/plant	Greenhouse
D17-Year 1	Mulugeta et. al 2023	O. americanum	C	0.6	0	3	ml/plant	Greenhouse
D17-Year 1	Mulugeta et. al 2023	O. americanum	M	0.4	0.173205	3	ml/plant	Greenhouse
D17-Year 1	Mulugeta et. al 2023	O. americanum	S	0.1	0	3	ml/plant	Greenhouse
D17-Year 2	Mulugeta et. al 2023	O. americanum	C	0.4	0	3	ml/plant	Greenhouse
D17-Year 2	Mulugeta et. al 2023	O. americanum	M	0.1	0	3	ml/plant	Greenhouse
D17-Year 2	Mulugeta et. al 2023	O. americanum	S	0.1	0	3	ml/plant	Greenhouse
D22	Mulugeta et. al. 2012	O. basilicum ’Ohre’	C	1.25	0.678823	2	ml/plant	Field
D22	Mulugeta et. al. 2012	O. basilicum ’Ohre’	M	0.83	0.367696	2	ml/plant	Field
D22	Mulugeta et. al. 2012	O. basilicum ‘Genovese’	C	0.71	0.113137	2	ml/plant	Field
D22	Mulugeta et. al. 2012	O. basilicum ‘Genovese’	M	0.69	0.268701	2	ml/plant	Field
D22	Mulugeta et. al. 2012	O. × africanum	C	1.32	0.59397	2	ml/plant	Field
D22	Mulugeta et. al. 2012	O. × africanum	M	1.46	1.31522	2	ml/plant	Field
D22	Mulugeta et. al. 2012	O. americanum	C	0.4	0.565685	2	ml/plant	Field
D22	Mulugeta et. al. 2012	O. americanum	M	0.36	0.509117	2	ml/plant	Field
D22	Mulugeta et. al. 2012	O. selloi	C	0.46	0.650538	2	ml/plant	Field
D22	Mulugeta et. al. 2012	O. selloi	M	0.62	0.876812	2	ml/plant	Field
D22	Mulugeta et. al. 2012	O. sanctum ‘Krishna’	C	0.4	0.565685	2	ml/plant	Field
D22	Mulugeta et. al. 2012	O. sanctum ‘Krishna’	M	0.38	0.537401	2	ml/plant	Field
D26	García-Caparrós et all, 2019	L. Latifolia	C	14.19	2.42	4	mL/m2	Field
D26	García-Caparrós et all, 2019	L. Latifolia	M	9.09	1.84	4	mL/m2	Field
D26	García-Caparrós et all, 2019	M. piperita	C	7.28	1.36	4	mL/m2	Field
D26	García-Caparrós et all, 2019	M. piperita	M	6.54	1.22	4	mL/m2	Field
D26	García-Caparrós et all, 2019	S. lavandulifolia	C	3.62	0.68	4	mL/m2	Field
D26	García-Caparrós et all, 2019	S. lavandulifolia	M	3.86	0.76	4	mL/m2	Field
D26	García-Caparrós et all, 2019	S. sclarea	C	3.88	0.72	4	mL/m2	Field
D26	García-Caparrós et all, 2019	S. sclarea	M	1.81	0.34	4	mL/m2	Field
D26	García-Caparrós et all, 2019	T. capitatus	C	24.57	4.88	4	mL/m2	Field
D26	García-Caparrós et all, 2019	T. capitatus	M	22.32	4.36	4	mL/m2	Field
D26	García-Caparrós et all, 2019	T. mastichina	C	15.25	2.82	4	mL/m2	Field
D26	García-Caparrós et all, 2019	T. mastichina	M	16.65	2.96	4	mL/m2	Field
D31	Bistgani et all, 2017	Thymus daenensis	C	0.14	0.242487	3	g/plant	Field
D31	Bistgani et all, 2017	Thymus daenensis	M	0.15	0.259808	3	g/plant	Field
D31	Bistgani et all, 2017	Thymus daenensis	S	0.13	0.225167	3	g/plant	Field
D31	Bistgani et all, 2017	Thymus daenensis	C	1.07	0.450333	3	g/plant	Field
D31	Bistgani et all, 2017	Thymus daenensis	M	1.14	0.484974	3	g/plant	Field
D31	Bistgani et all, 2017	Thymus daenensis	S	0.72	0.34641	3	g/plant	Field
D32	Bidabadi et. al. 2020	Salvia nemorosa L.	C	0.29	0.0502295	3	g/plant	Greenhouse
D32	Bidabadi et. al. 2020	Salvia nemorosa L.	M	0.38	0.038	3	g/plant	Greenhouse
D32	Bidabadi et. al. 2020	Salvia nemorosa L.	S	0.22	0.0170411	3	g/plant	Greenhouse
D32	Bidabadi et. al. 2020	Salvia reuterana Boiss.	C	0.25	0.025	3	g/plant	Greenhouse
D32	Bidabadi et. al. 2020	Salvia reuterana Boiss.	M	25	2.5	3	g/plant	Greenhouse
D32	Bidabadi et. al. 2020	Salvia reuterana Boiss.	S	0.2	0.02	3	g/plant	Greenhouse

## Sheet: Chlorophyll Content
Ref No #	Reference	Plant Species	Stress Level	Mean	SD	N	Unit	Field/Pot
D1	Chrysargyris et. al. 2016	Lavender	C	1.08	0.0848528	8	mg chl/g	Greenhosue
D1	Chrysargyris et. al. 2016	Lavender	M	0.93	0.367696	8	mg chl/g	Greenhosue
D1	Chrysargyris et. al. 2016	Lavender	S	1.13	0.480833	8	mg chl/g	Greenhosue
D1	Chrysargyris et. al. 2016	Sage	C	1.18	0.19799	8	mg chl/g	Greenhosue
D1	Chrysargyris et. al. 2016	Sage	M	0.96	0.169706	8	mg chl/g	Greenhosue
D1	Chrysargyris et. al. 2016	Sage	S	1.25	0.169706	8	mg chl/g	Greenhosue
D2	Rahimi et. al. 2022	Thymus vulgaris L.	C	1.563	0.032909	3	mg g/FW chl a	Field
D2	Rahimi et. al. 2022	Thymus vulgaris L.	S	0.937	0.0606218	3	mg g/FW chl a	Field
D2	Rahimi et. al. 2022	Thymus vulgaris L.	C	1.506	0.136832	3	mg g/FW chl b	Field
D2	Rahimi et. al. 2022	Thymus vulgaris L.	S	0.538	0.115181	3	mg g/FW chl b	Field
D3	Aslani et. al. 2023	Salvia officinalis	C	35.04	1.03923	3	SPAD	Greenhosue
D3	Aslani et. al. 2023	Salvia officinalis	M	31.85	0.917987	3	SPAD	Greenhosue
D3	Aslani et. al. 2023	Salvia officinalis	S	30.47	0.450333	3	SPAD	Greenhosue
D6	Rahimi et. al. 2023	Thymus vulgaris L.	C	2.06	0.190526	3	mg/g FW	Field
D6	Rahimi et. al. 2023	Thymus vulgaris L.	M	1.8	0.155885	3	mg/g FW	Field
D6	Rahimi et. al. 2023	Thymus vulgaris L.	S	1.56	0.155885	3	mg/g FW	Field
D7	Rahimi et. al. 2023	Ocimum basilicum genotypes	C	16.5	3.61	154	mg total chlorophyll/g tissue	Greenhosue
D7	Rahimi et. al. 2023	Ocimum basilicum genotypes	M	12.91	3.28	154	mg total chlorophyll/g tissue	Greenhosue
D7	Rahimi et. al. 2023	Ocimum basilicum genotypes	S	11.76	2.22	154	mg total chlorophyll/g tissue	Greenhosue
D15	Imani et. al. 2023	Salvia Miryazanii	C	40.36	3.3775	3	mg/g fw chl a	Greenhosue
D15	Imani et. al. 2023	Salvia Miryazanii	M	35.73	3.06573	3	mg/g fw chl a	Greenhosue
D15	Imani et. al. 2023	Salvia Miryazanii	S	23.14	2.06114	3	mg/g fw chl a	Greenhosue
D15	Imani et. al. 2023	Salvia Miryazanii	C	18.46	1.67143	3	mg/g fw chl b	Greenhosue
D15	Imani et. al. 2023	Salvia Miryazanii	M	18.02	1.55885	3	mg/g fw chl b	Greenhosue
D15	Imani et. al. 2023	Salvia Miryazanii	S	13.11	1.20378	3	mg/g fw chl b	Greenhosue
D17-Year 1	Mulugeta et. al. 2023	O. basilicum	C	32.9	3.2909	3	SPAD	Greenhosue
D17-Year 1	Mulugeta et. al. 2023	O. basilicum	M	40.7	2.94449	3	SPAD	Greenhosue
D17-Year 1	Mulugeta et. al. 2023	O. basilicum	S	42.7	3.63731	3	SPAD	Greenhosue
D17-Year 2	Mulugeta et. al. 2023	O. basilicum	C	40.3	5.19615	3	SPAD	Greenhosue
D17-Year 2	Mulugeta et. al. 2023	O. basilicum	M	42.9	2.77128	3	SPAD	Greenhosue
D17-Year 2	Mulugeta et. al. 2023	O. basilicum	S	45.9	5.54256	3	SPAD	Greenhosue
D17-Year 1	Mulugeta et. al. 2023	O. × africanum	C	47	8.31384	3	SPAD	Greenhosue
D17-Year 1	Mulugeta et. al. 2023	O. × africanum	M	47.8	4.67654	3	SPAD	Greenhosue
D17-Year 1	Mulugeta et. al. 2023	O. × africanum	S	52.5	2.94449	3	SPAD	Greenhosue
D17-Year 2	Mulugeta et. al. 2023	O. × africanum	C	42.4	5.36936	3	SPAD	Greenhosue
D17-Year 2	Mulugeta et. al. 2023	O. × africanum	M	50.6	2.42487	3	SPAD	Greenhosue
D17-Year 2	Mulugeta et. al. 2023	O. × africanum	S	52.5	2.94449	3	SPAD	Greenhosue
D17-Year 1	Mulugeta et. al. 2023	O. americanum	C	44.8	3.63731	3	SPAD	Greenhosue
D17-Year 1	Mulugeta et. al. 2023	O. americanum	M	51.2	7.62102	3	SPAD	Greenhosue
D17-Year 1	Mulugeta et. al. 2023	O. americanum	S	51	4.33013	3	SPAD	Greenhosue
D17-Year 2	Mulugeta et. al. 2023	O. americanum	C	42	3.63731	3	SPAD	Greenhosue
D17-Year 2	Mulugeta et. al. 2023	O. americanum	M	44.4	3.81051	3	SPAD	Greenhosue
D17-Year 2	Mulugeta et. al. 2023	O. americanum	S	46.7	3.2909	3	SPAD	Greenhosue
D19	Amiri et. al. 2016	Pelargonium graveolens L.	C	0.25	0.0866025	3	mg g−1 DW total	Greenhosue
D19	Amiri et. al. 2016	Pelargonium graveolens L.	M	0.2	0.0519615	3	mg g−1 DW total	Greenhosue
D19	Amiri et. al. 2016	Pelargonium graveolens L.	S	0.16	0.0519615	3	mg g−1 DW total	Greenhosue
D24	Bayat and Moghadam 2019	Salvia nemorosa L. Isfahan	C	1.38	0.440908	6	mg/g FW Total	Greenhouse
D24	Bayat and Moghadam 2019	Salvia nemorosa L. Isfahan	S	1.13	0.342929	6	mg/g FW Total	Greenhouse
D24	Bayat and Moghadam 2019	Salvia nemorosa L. Violet Queen	C	1.29	0.195959	6	mg/g FW Total	Greenhouse
D24	Bayat and Moghadam 2019	Salvia nemorosa L. Violet Queen	S	0.91	0.220454	6	mg/g FW Total	Greenhouse
D24	Bayat and Moghadam 2019	Salvia nemorosa L. Rose Queen	C	0.84	0.293939	6	mg/g FW Total	Greenhouse
D24	Bayat and Moghadam 2019	Salvia nemorosa L. Rose Queen	S	0.6	0.220454	6	mg/g FW Total	Greenhouse
D30	Mohammadi et. al. 2018	Thymus vulgaris	C	1.401	0.0935307	3	mg/g FW Total	Field
D30	Mohammadi et. al. 2018	Thymus vulgaris	M	0.818	0.0519615	3	mg/g FW Total	Field
D31-Year 1	Bistgani et. al. 2017	Thymus daenensis	C	3.91	0.207846	3	mg/g chl a	Field
D31-Year 1	Bistgani et. al. 2017	Thymus daenensis	M	3.78	0.225167	3	mg/g chl a	Field
D31-Year 1	Bistgani et. al. 2017	Thymus daenensis	S	3.73	0.242487	3	mg/g chl a	Field
D31-Year 2	Bistgani et. al. 2017	Thymus daenensis	C	4.52	1.38564	3	mg/g chl a	Field
D31-Year 2	Bistgani et. al. 2017	Thymus daenensis	M	3.13	1.09119	3	mg/g chl a	Field
D31-Year 2	Bistgani et. al. 2017	Thymus daenensis	S	2.6	0.987269	3	mg/g chl a	Field
D31-Year 1	Bistgani et. al. 2017	Thymus daenensis	C	3.4	0.173205	3	mg/g chl b	Field
D31-Year 1	Bistgani et. al. 2017	Thymus daenensis	M	3.4	0.173205	3	mg/g chl b	Field
D31-Year 1	Bistgani et. al. 2017	Thymus daenensis	S	3.9	0.519615	3	mg/g chl b	Field
D31-Year 2	Bistgani et. al. 2017	Thymus daenensis	C	4.88	0.744782	3	mg/g chl b	Field
D31-Year 2	Bistgani et. al. 2017	Thymus daenensis	M	4.82	0.710141	3	mg/g chl b	Field
D31-Year 2	Bistgani et. al. 2017	Thymus daenensis	S	4.8	2.49415	3	mg/g chl b	Field
D33	Bettaieb et. al. 2011	Salvia officinalis L.	C	5.63	0.190526	3	mg/g FW Total	Greenhosue
D33	Bettaieb et. al. 2011	Salvia officinalis L.	M	1.21	0.0173205	3	mg/g FW Total	Greenhosue
D33	Bettaieb et. al. 2011	Salvia officinalis L.	S	0.25	0.0173205	3	mg/g FW Total	Greenhosue

## Sheet: Relative Water Content
Ref No #	Reference	Plant Species	Stress Level	Mean	SD	N	Unit	Field/Pot
D2	Rahimi et. al. 2022	Thymus vulgaris L.	C	27.74	3.65463	3	%	Field
D2	Rahimi et. al. 2022	Thymus vulgaris L.	S	19.43	2.67602	3	%	Field
D3	Aslani et all, 2023	Salvia officinalis	C	70.05	0.623538	3	%	Greenhouse
D3	Aslani et all, 2023	Salvia officinalis	M	65.85	3.25626	3	%	Greenhouse
D3	Aslani et all, 2023	Salvia officinalis	S	51.6	2.13042	3	%	Greenhouse
D17-Year 1	Mulugeta et. al 2023	O. basilicum	C	94.9	3.11769	3	%	Greenhouse
D17-Year 1	Mulugeta et. al 2023	O. basilicum	M	89.8	2.42487	3	%	Greenhouse
D17-Year 1	Mulugeta et. al 2023	O. basilicum	S	78.9	4.84974	3	%	Greenhouse
D17-Year 2	Mulugeta et. al 2023	O. basilicum	C	85.9	4.67654	3	%	Greenhouse
D17-Year 2	Mulugeta et. al 2023	O. basilicum	M	73.8	6.06218	3	%	Greenhouse
D17-Year 2	Mulugeta et. al 2023	O. basilicum	S	62.5	11.0851	3	%	Greenhouse
D17-Year 1	Mulugeta et. al 2023	O. × africanum	C	92.2	2.25167	3	%	Greenhouse
D17-Year 1	Mulugeta et. al 2023	O. × africanum	M	80.4	7.62102	3	%	Greenhouse
D17-Year 1	Mulugeta et. al 2023	O. × africanum	S	73.6	5.19615	3	%	Greenhouse
D17-Year 2	Mulugeta et. al 2023	O. × africanum	C	91.6	7.79423	3	%	Greenhouse
D17-Year 2	Mulugeta et. al 2023	O. × africanum	M	71.5	13.1636	3	%	Greenhouse
D17-Year 2	Mulugeta et. al 2023	O. × africanum	S	66.8	6.755	3	%	Greenhouse
D17-Year 1	Mulugeta et. al 2023	O. americanum	C	95.8	3.4641	3	%	Greenhouse
D17-Year 1	Mulugeta et. al 2023	O. americanum	M	85.3	3.2909	3	%	Greenhouse
D17-Year 1	Mulugeta et. al 2023	O. americanum	S	76	3.2909	3	%	Greenhouse
D17-Year 2	Mulugeta et. al 2023	O. americanum	C	83	4.15692	3	%	Greenhouse
D17-Year 2	Mulugeta et. al 2023	O. americanum	M	60.3	7.62102	3	%	Greenhouse
D17-Year 2	Mulugeta et. al 2023	O. americanum	S	51.3	5.88897	3	%	Greenhouse
D19	Amiri et. al. 2016	Pelargonium graveolens L.	C	83.6	6.06218	3	%	Greenhouse
D19	Amiri et. al. 2016	Pelargonium graveolens L.	M	73.6	8.31384	3	%	Greenhouse
D19	Amiri et. al. 2016	Pelargonium graveolens L.	S	66.5	8.14064	3	%	Greenhouse
D26	García-Caparrós et al. 2019	L. Latifolia	C	64.91	12.14	4	%	Field
D26	García-Caparrós et al. 2019	L. Latifolia	M	59.99	12.1	4	%	Field
D26	García-Caparrós et al. 2019	M. piperita	C	77.49	12.48	4	%	Field
D26	García-Caparrós et al. 2019	M. piperita	M	65.19	11.86	4	%	Field
D26	García-Caparrós et al. 2019	S. lavandulifolia	C	73.4	13.7	4	%	Field
D26	García-Caparrós et al. 2019	S. lavandulifolia	M	74.44	14.46	4	%	Field
D26	García-Caparrós et al. 2019	S. sclarea	C	80.42	16.22	4	%	Field
D26	García-Caparrós et al. 2019	S. sclarea	M	80.13	15.6	4	%	Field
D26	García-Caparrós et al. 2019	T. capitatus	C	66.34	12.14	4	%	Field
D26	García-Caparrós et al. 2019	T. capitatus	M	53.64	10.08	4	%	Field
D26	García-Caparrós et al. 2019	T. mastichina	C	69.48	13.3	4	%	Field
D26	García-Caparrós et al. 2019	T. mastichina	M	68.6	13.16	4	%	Field
D30	Mohammadi et al. 2018	Thymus vulgaris	C	75.79	0.484974	3	%	Field
D30	Mohammadi et al. 2018	Thymus vulgaris	M	61.83	0.606218	3	%	Field
D34	Torun et. al. 2021	Hypericum perforatum L.	C	98.5	2.52297	6	%	Greenhouse
D34	Torun et. al. 2021	Hypericum perforatum L.	M	84.7	5.04595	6	%	Greenhouse
D35	Habibi 2024	Aloe Vera L.	C	88	10.4652	8	%	Greenhosue
D35	Habibi 2024	Aloe Vera L.	M	84	12.7279	8	%	Greenhosue
D35	Habibi 2024	Aloe Vera L.	S	71	6.22254	8	%	Greenhosue
D37	Talbia et. al. 2020	Oudeneya africana	C	83.2	6.00125	6	%	Greenhosue
D37	Talbia et. al. 2020	Oudeneya africana	M	78.19	3.33131	6	%	Greenhosue
D37	Talbia et. al. 2020	Oudeneya africana	S	72.14	4.11514	6	%	Greenhosue

## Sheet: Antioxidant
Ref No #	Reference	Plant Species	Antioxidant Type	Stress Level	Mean	SD	N	Unit	Field/Pot
D1	Chrysargyris et. al. 2016	Lavender	DPPH	C	12.67	6.33568	8	mg/g Trolox	Greenhosue
D1	Chrysargyris et. al. 2016	Lavender	DPPH	M	13.59	10.5783	8	mg/g Trolox	Greenhosue
D1	Chrysargyris et. al. 2016	Lavender	DPPH	S	14.19	5.65685	8	mg/g Trolox	Greenhosue
D1	Chrysargyris et. al. 2016	Sage	DPPH	C	23.59	4.52548	8	mg/g Trolox	Greenhosue
D1	Chrysargyris et. al. 2016	Sage	DPPH	M	27.66	6.73166	8	mg/g Trolox	Greenhosue
D1	Chrysargyris et. al. 2016	Sage	DPPH	S	31.45	2.31931	8	mg/g Trolox	Greenhosue
D1	Chrysargyris et. al. 2016	Lavender	FRAP	C	14.48	4.29921	8	mg/g Trolox	Greenhosue
D1	Chrysargyris et. al. 2016	Lavender	FRAP	M	16.51	9.24896	8	mg/g Trolox	Greenhosue
D1	Chrysargyris et. al. 2016	Lavender	FRAP	S	14.87	3.70524	8	mg/g Trolox	Greenhosue
D1	Chrysargyris et. al. 2016	Sage	FRAP	C	33.53	3.4224	8	mg/g Trolox	Greenhosue
D1	Chrysargyris et. al. 2016	Sage	FRAP	M	44.82	7.41048	8	mg/g Trolox	Greenhosue
D1	Chrysargyris et. al. 2016	Sage	FRAP	S	48.9	7.43876	8	mg/g Trolox	Greenhosue
D1	Chrysargyris et. al. 2016	Lavender	ABTS	C	8.98	4.27092	8	mg/g Trolox	Greenhosue
D1	Chrysargyris et. al. 2016	Lavender	ABTS	M	10.78	7.89131	8	mg/g Trolox	Greenhosue
D1	Chrysargyris et. al. 2016	Lavender	ABTS	S	8.36	2.34759	8	mg/g Trolox	Greenhosue
D1	Chrysargyris et. al. 2016	Sage	ABTS	C	22	3.93151	8	mg/g Trolox	Greenhosue
D1	Chrysargyris et. al. 2016	Sage	ABTS	M	24.25	5.43058	8	mg/g Trolox	Greenhosue
D1	Chrysargyris et. al. 2016	Sage	ABTS	S	28.7	4.86489	8	mg/g Trolox	Greenhosue
D10	Abdi et. al. 2019	Mentha × piperita L.	DPPH	C	60.4	2.93939	6	μg/mL	Greenhosue
D10	Abdi et. al. 2019	Mentha × piperita L.	DPPH	M	34.2	7.59342	6	μg/mL	Greenhosue
D10	Abdi et. al. 2019	Mentha × piperita L.	DPPH	S	21.2	5.14393	6	μg/mL	Greenhosue
D10	Abdi et. al. 2019	Mentha × piperita L.	ABTS	C	16.5	0.734847	6	μg/mL	Greenhosue
D10	Abdi et. al. 2019	Mentha × piperita L.	ABTS	M	11.2	0.979796	6	μg/mL	Greenhosue
D10	Abdi et. al. 2019	Mentha × piperita L.	ABTS	S	8.4	0.489898	6	μg/mL	Greenhosue
D17-Year 1	Mulugeta et. al 2023	O. basilicum	FRAP	C	137.2	28.4056	3	mg AAE	Greenhosue
D17-Year 1	Mulugeta et. al 2023	O. basilicum	FRAP	M	127.3	84.8705	3	mg AAE	Greenhosue
D17-Year 1	Mulugeta et. al 2023	O. basilicum	FRAP	S	180	21.6506	3	mg AAE	Greenhosue
D17-Year 2	Mulugeta et. al 2023	O. basilicum	FRAP	C	110.9	37.7587	3	mg AAE	Greenhosue
D17-Year 2	Mulugeta et. al 2023	O. basilicum	FRAP	M	126.1	28.2324	3	mg AAE	Greenhosue
D17-Year 2	Mulugeta et. al 2023	O. basilicum	FRAP	S	128	19.399	3	mg AAE	Greenhosue
D17-Year 1	Mulugeta et. al 2023	O. × africanum	FRAP	C	144.9	38.1051	3	mg AAE	Greenhosue
D17-Year 1	Mulugeta et. al 2023	O. × africanum	FRAP	M	132.4	34.2946	3	mg AAE	Greenhosue
D17-Year 1	Mulugeta et. al 2023	O. × africanum	FRAP	S	152.4	45.8993	3	mg AAE	Greenhosue
D17-Year 2	Mulugeta et. al 2023	O. × africanum	FRAP	C	114.3	24.7683	3	mg AAE	Greenhosue
D17-Year 2	Mulugeta et. al 2023	O. × africanum	FRAP	M	89.7	37.2391	3	mg AAE	Greenhosue
D17-Year 2	Mulugeta et. al 2023	O. × africanum	FRAP	S	106.4	41.9156	3	mg AAE	Greenhosue
D17-Year 1	Mulugeta et. al 2023	O. americanum	FRAP	C	200	27.3664	3	mg AAE	Greenhosue
D17-Year 1	Mulugeta et. al 2023	O. americanum	FRAP	M	224.6	57.3309	3	mg AAE	Greenhosue
D17-Year 1	Mulugeta et. al 2023	O. americanum	FRAP	S	210.5	31.0037	3	mg AAE	Greenhosue
D17-Year 2	Mulugeta et. al 2023	O. americanum	FRAP	C	52.8	31.0037	3	mg AAE	Greenhosue
D17-Year 2	Mulugeta et. al 2023	O. americanum	FRAP	M	69.8	50.5759	3	mg AAE	Greenhosue
D17-Year 2	Mulugeta et. al 2023	O. americanum	FRAP	S	85.3	24.0755	3	mg AAE	Greenhosue
D19	Amiri et. al. 2016	Pelargonium graveolens L.	DPPH	C	69.4	4.84974	3	%	Greenhosue
D19	Amiri et. al. 2016	Pelargonium graveolens L.	DPPH	M	76.2	5.02295	3	%	Greenhosue
D19	Amiri et. al. 2016	Pelargonium graveolens L.	DPPH	S	56	6.23538	3	%	Greenhosue
D20	Bettaieb et. al. 2011	Cuminum cyminum L.	DPPH	C	84.22	1.47224	3	μg/mL	Greenhosue
D20	Bettaieb et. al. 2011	Cuminum cyminum L.	DPPH	M	64.78	1.28172	3	μg/mL	Greenhosue
D20	Bettaieb et. al. 2011	Cuminum cyminum L.	DPPH	S	298.34	2.30363	3	μg/mL	Greenhosue
D22	Mulugeta et. al. 2012	O. basilicum ’Ohre’	FRAP	C	129.3	52.1845	2	mg AAE/g DM	Field
D22	Mulugeta et. al. 2012	O. basilicum ’Ohre’	FRAP	M	131.48	45.8205	2	mg AAE/g DM	Field
D22	Mulugeta et. al. 2012	O. basilicum ‘Genovese’	FRAP	C	109.95	47.4327	2	mg AAE/g DM	Field
D22	Mulugeta et. al. 2012	O. basilicum ‘Genovese’	FRAP	M	149.93	49.8793	2	mg AAE/g DM	Field
D22	Mulugeta et. al. 2012	O. × africanum	FRAP	C	62.95	39.7818	2	mg AAE/g DM	Field
D22	Mulugeta et. al. 2012	O. × africanum	FRAP	M	134.72	39.3293	2	mg AAE/g DM	Field
D22	Mulugeta et. al. 2012	O. americanum	FRAP	C	150.2	62.6497	2	mg AAE/g DM	Field
D22	Mulugeta et. al. 2012	O. americanum	FRAP	M	137.59	69.155	2	mg AAE/g DM	Field
D22	Mulugeta et. al. 2012	O. selloi	FRAP	C	250.86	24.4659	2	mg AAE/g DM	Field
D22	Mulugeta et. al. 2012	O. selloi	FRAP	M	249.2	90.0854	2	mg AAE/g DM	Field
D22	Mulugeta et. al. 2012	O. sanctum ‘Krishna’	FRAP	C	128.92	64.1629	2	mg AAE/g DM	Field
D22	Mulugeta et. al. 2012	O. sanctum ‘Krishna’	FRAP	M	157.6	62.9325	2	mg AAE/g DM	Field
D33	Bettaieb et. al. 2011	Salvia officinalis L.	DPPH	C	135	7.23997	3	mg/ml	Greenhosue
D33	Bettaieb et. al. 2011	Salvia officinalis L.	DPPH	M	111.5	4.50333	3	mg/ml	Greenhosue
D33	Bettaieb et. al. 2011	Salvia officinalis L.	DPPH	S	52.7	1.5242	3	mg/ml	Greenhosue
D33	Bettaieb et. al. 2011	Salvia officinalis L.	FRAP	C	1.07	0.034641	3	mg/ml	Greenhosue
D33	Bettaieb et. al. 2011	Salvia officinalis L.	FRAP	M	0.52	0.0173205	3	mg/ml	Greenhosue
D33	Bettaieb et. al. 2011	Salvia officinalis L.	FRAP	S	0.34	0.0173205	3	mg/ml	Greenhosue
D35	Habibi 2024	Aloe Vera L.	DPPH	C	59.07	18.2716	8	%	Greenhosue
D35	Habibi 2024	Aloe Vera L.	DPPH	M	72.61	13.0673	8	%	Greenhosue
D35	Habibi 2024	Aloe Vera L.	DPPH	S	52.92	9.56008	8	%	Greenhosue
D37	Talbia et. al. 2020	Oudeneya africana	ABTS	C	19.7	21.4085	6	TEAC; mM/g DW	Greenhosue
D37	Talbia et. al. 2020	Oudeneya africana	ABTS	M	43.7	6.12372	6	TEAC; mM/g DW	Greenhosue
D37	Talbia et. al. 2020	Oudeneya africana	ABTS	S	48.9	2.69444	6	TEAC; mM/g DW	Greenhosue

## Sheet: Enzymatic Antioxidant
Ref No #	Reference	Plant Species	Antioxidant Type	Stress Level	Mean	SD	N	Unit	Field/Pot
D2	Rahimi et. al. 2022	Thymus vulgaris L.	CAT	C	0.77	0.129038	3	umol/g	Field
D2	Rahimi et. al. 2022	Thymus vulgaris L.	CAT	S	1.88	0.184463	3	umol/g	Field
D2	Rahimi et. al. 2022	Thymus vulgaris L.	SOD	C	33.69	2.38417	3	umol/g	Field
D2	Rahimi et. al. 2022	Thymus vulgaris L.	SOD	S	54.79	2.6102	3	umol/g	Field
D6	Rahimi et. al. 2023	Thymus vulgaris L.	CAT	C	0.7	0.103923	3	umol/g	Field
D6	Rahimi et. al. 2023	Thymus vulgaris L.	CAT	M	1.67	0.0173205	3	umol/g	Field
D6	Rahimi et. al. 2023	Thymus vulgaris L.	CAT	S	2.44	0.0259808	3	umol/g	Field
D6	Rahimi et. al. 2023	Thymus vulgaris L.	SOD	C	17.89	4.25218	3	umol/g	Field
D6	Rahimi et. al. 2023	Thymus vulgaris L.	SOD	M	40.69	0.623538	3	umol/g	Field
D6	Rahimi et. al. 2023	Thymus vulgaris L.	SOD	S	58.59	1.07387	3	umol/g	Field
D15	Imani et. al. 2023	Salvia Miryazanii	CAT	C	0.88	0.0822724	3	mg/g fw	Greenhouse
D15	Imani et. al. 2023	Salvia Miryazanii	CAT	M	1.63	0.129904	3	mg/g fw	Greenhouse
D15	Imani et. al. 2023	Salvia Miryazanii	CAT	S	2.99	0.277128	3	mg/g fw	Greenhouse
D15	Imani et. al. 2023	Salvia Miryazanii	SOD	C	0.66	0.0545596	3	mg/g fw	Greenhouse
D15	Imani et. al. 2023	Salvia Miryazanii	SOD	M	2.09	0.173205	3	mg/g fw	Greenhouse
D15	Imani et. al. 2023	Salvia Miryazanii	SOD	S	2.11	0.173205	3	mg/g fw	Greenhouse
D15	Imani et. al. 2023	Salvia Miryazanii	POD	C	0.98	0.0866025	3	mg/g fw	Greenhouse
D15	Imani et. al. 2023	Salvia Miryazanii	POD	M	1.52	0.138564	3	mg/g fw	Greenhouse
D15	Imani et. al. 2023	Salvia Miryazanii	POD	S	1.51	0.129904	3	mg/g fw	Greenhouse
D30	Mohammadi et. al. 2018	Thymus vulgaris	SOD	C	21.699	2.82324	3	μmol g/ DW	Field
D30	Mohammadi et. al. 2018	Thymus vulgaris	SOD	M	49.811	1.99186	3	μmol/g DW	Field
D30	Mohammadi et. al. 2018	Thymus vulgaris	CAT	C	20.474	0.381051	3	μmol g/ DW	Field
D30	Mohammadi et. al. 2018	Thymus vulgaris	CAT	M	17.485	0.606218	3	μmol/g DW	Field
D32	Bidabadi et. al. 2020	Salvia nemorosa L.	CAT	C	0.036	0.002	3	μ mole min/mg protein	Greenhouse
D32	Bidabadi et. al. 2020	Salvia nemorosa L.	CAT	M	0.027	0.002	3	μ mole min/mg protein	Greenhouse
D32	Bidabadi et. al. 2020	Salvia nemorosa L.	CAT	S	0.071	0.003	3	μ mole min/mg protein	Greenhouse
D32	Bidabadi et. al. 2020	Salvia reuterana Boiss.	CAT	C	0.034	0.002	3	μ mole min/mg protein	Greenhouse
D32	Bidabadi et. al. 2020	Salvia reuterana Boiss.	CAT	M	0.025	0.002	3	μ mole min/mg protein	Greenhouse
D32	Bidabadi et. al. 2020	Salvia reuterana Boiss.	CAT	S	0.064	0.002	3	μ mole min/mg protein	Greenhouse
D32	Bidabadi et. al. 2020	Salvia nemorosa L.	POD	C	0.051	0.001	3	μ mole min/mg protein	Greenhouse
D32	Bidabadi et. al. 2020	Salvia nemorosa L.	POD	M	0.133	0.004	3	μ mole min/mg protein	Greenhouse
D32	Bidabadi et. al. 2020	Salvia nemorosa L.	POD	S	0.272	0.01	3	μ mole min/mg protein	Greenhouse
D32	Bidabadi et. al. 2020	Salvia reuterana Boiss.	POD	C	0.041	0.002	3	μ mole min/mg protein	Greenhouse
D32	Bidabadi et. al. 2020	Salvia reuterana Boiss.	POD	M	0.117	0.003	3	μ mole min/mg protein	Greenhouse
D32	Bidabadi et. al. 2020	Salvia reuterana Boiss.	POD	S	0.353	0.01	3	μ mole min/mg protein	Greenhouse
D32	Bidabadi et. al. 2020	Salvia nemorosa L.	SOD	C	0.058	0.002	3	μ mole min/mg protein	Greenhouse
D32	Bidabadi et. al. 2020	Salvia nemorosa L.	SOD	M	0.039	0.002	3	μ mole min/mg protein	Greenhouse
D32	Bidabadi et. al. 2020	Salvia nemorosa L.	SOD	S	0.058	0.002	3	μ mole min/mg protein	Greenhouse
D32	Bidabadi et. al. 2020	Salvia reuterana Boiss.	SOD	C	0.004	0.0005	3	μ mole min/mg protein	Greenhouse
D32	Bidabadi et. al. 2020	Salvia reuterana Boiss.	SOD	M	0.033	0.002	3	μ mole min/mg protein	Greenhouse
D32	Bidabadi et. al. 2020	Salvia reuterana Boiss.	SOD	S	0.052	0.002	3	μ mole min/mg protein	Greenhouse
D34	Torun et. al. 2021	Hypericum perforatum L.	SOD	C	14.231	1.06063	6	μmol/g	Greenhouse
D34	Torun et. al. 2021	Hypericum perforatum L.	SOD	M	20.481	4.35764	6	μmol/g	Greenhouse
D34	Torun et. al. 2021	Hypericum perforatum L.	CAT	C	0.06	0.0318434	6	μmol/g	Greenhouse
D34	Torun et. al. 2021	Hypericum perforatum L.	CAT	M	0.085	0.0514393	6	μmol/g	Greenhouse

## Sheet: Flavonoid
Ref No #	Reference	Plant Species	Stress Level	Mean	SD	N	Unit	Field/Pot
D1	Chrysargyris et. al. 2016	Lavender	C	16.15	5.88313	8	mg/g Rutin	Greenhosue
D1	Chrysargyris et. al. 2016	Lavender	M	16.42	12.3885	8	mg/g Rutin	Greenhosue
D1	Chrysargyris et. al. 2016	Lavender	S	13.43	3.81838	8	mg/g Rutin	Greenhosue
D1	Chrysargyris et. al. 2016	Sage	C	32.92	2.09304	8	mg/g Rutin	Greenhosue
D1	Chrysargyris et. al. 2016	Sage	M	44.47	7.89131	8	mg/g Rutin	Greenhosue
D1	Chrysargyris et. al. 2016	Sage	S	48.27	7.58018	8	mg/g Rutin	Greenhosue
D2	Rahimi et. al. 2022	Thymus vulgaris L.	C	0.286	0.034641	3	mg/g DW	Field
D2	Rahimi et. al. 2022	Thymus vulgaris L.	S	0.537	0.0372391	3	mg/g DW	Field
D7	Rahimi et. al. 2023	Ocimum basilicum genotypes	C	5.58	1.75	154	mg CE/100 g dw	Greenhosue
D7	Rahimi et. al. 2023	Ocimum basilicum genotypes	M	7.26	1.57	154	mg CE/100 g dw	Greenhosue
D7	Rahimi et. al. 2023	Ocimum basilicum genotypes	S	8.25	1.67	154	mg CE/100 g dw	Greenhosue
D8	Jafari and Shahsavar 2021	C. Aurantifolia Swingle	C	7.46	0.68	4	mg QE/g	Greenhouse
D8	Jafari and Shahsavar 2021	C. Aurantifolia Swingle	M	35.86	2.13	4	mg QE/g	Greenhouse
D8	Jafari and Shahsavar 2021	C. Aurantifolia Swingle	S	15.33	1.34	4	mg QE/g	Greenhouse
D8	Jafari and Shahsavar 2021	C. latifolia Tanaka	C	8.66	0.93	4	mg QE/g	Greenhouse
D8	Jafari and Shahsavar 2021	C. latifolia Tanaka	M	37.33	1.88	4	mg QE/g	Greenhouse
D8	Jafari and Shahsavar 2021	C. latifolia Tanaka	S	16.66	0.8	4	mg QE/g	Greenhouse
D10	ABDI et. al. 2019	Mentha × piperita L.	C	8.11	0.734847	6	μg CAE/ml	Greenhosue
D10	ABDI et. al. 2019	Mentha × piperita L.	M	10.21	3.91918	6	μg CAE/ml	Greenhosue
D10	ABDI et. al. 2019	Mentha × piperita L.	S	13.97	2.69444	6	μg CAE/ml	Greenhosue
D19	Amiri et. al. 2016	Pelargonium graveolens L.	C	6.1	3.11769	3	mg RE g−1 DW	Greenhosue
D19	Amiri et. al. 2016	Pelargonium graveolens L.	M	5	2.59808	3	mg RE g−1 DW	Greenhosue
D19	Amiri et. al. 2016	Pelargonium graveolens L.	S	3	2.07846	3	mg RE g−1 DW	Greenhosue
D24	Bayat and Moghadam 2019	Salvia nemorosa L. Isfahan	C	0.51	0.146969	6	mg/g FW	Greenhouse
D24	Bayat and Moghadam 2019	Salvia nemorosa L. Isfahan	S	0.76	0.367423	6	mg/g FW	Greenhouse
D24	Bayat and Moghadam 2019	Salvia nemorosa L. Violet Queen	C	0.45	0.0979796	6	mg/g FW	Greenhouse
D24	Bayat and Moghadam 2019	Salvia nemorosa L. Violet Queen	S	0.71	0.367423	6	mg/g FW	Greenhouse
D24	Bayat and Moghadam 2019	Salvia nemorosa L. Rose Queen	C	0.43	0.0979796	6	mg/g FW	Greenhouse
D24	Bayat and Moghadam 2019	Salvia nemorosa L. Rose Queen	S	0.64	0.122474	6	mg/g FW	Greenhouse
D35	Habibi 2024	Aloe Vera L.	C	0.8	0.079196	8	mg QE/DM	Greenhosue
D35	Habibi 2024	Aloe Vera L.	M	1.06	0.0650538	8	mg QE/DM	Greenhosue
D35	Habibi 2024	Aloe Vera L.	S	0.88	0.124451	8	mg QE/DM	Greenhosue
D37	Talbia et. al. 2020	Oudeneya africana	C	7.23	0.269444	6	mg QE/g DW	Greenhosue
D37	Talbia et. al. 2020	Oudeneya africana	M	20.38	0.955301	6	mg QE/g DW	Greenhosue
D37	Talbia et. al. 2020	Oudeneya africana	S	25.49	1.4452	6	mg QE/g DW	Greenhosue

## Sheet: Fenols
Ref No #	Reference	Plant Species	Stress Level	Mean	SD	N	Unit	Field/Pot
D1	Chrysargyris et. al. 2016	Lavender	C	9.08	2.34759	8	GAE, mg/g	Greenhosue
D1	Chrysargyris et. al. 2016	Lavender	M	9.41	6.08112	8	GAE, mg/g	Greenhosue
D1	Chrysargyris et. al. 2016	Lavender	S	8.08	1.6122	8	GAE, mg/g	Greenhosue
D1	Chrysargyris et. al. 2016	Sage	C	17.73	1.0748	8	GAE, mg/g	Greenhosue
D1	Chrysargyris et. al. 2016	Sage	M	22.56	4.92146	8	GAE, mg/g	Greenhosue
D1	Chrysargyris et. al. 2016	Sage	S	23.57	2.94156	8	GAE, mg/g	Greenhosue
D2	Rahimi et. al. 2022	Thymus vulgaris L.	C	3.47	0.329956	3	mg/g DW	Field
D2	Rahimi et. al. 2022	Thymus vulgaris L.	S	5.43	0.122976	3	mg/g DW	Field
D7	Rahimi et. al. 2023	Ocimum basilicum genotypes	C	43.81	9.56	154	mg phenols/100 g	Greenhosue
D7	Rahimi et. al. 2023	Ocimum basilicum genotypes	M	47.16	9.3	154	mg phenols/100 g	Greenhosue
D7	Rahimi et. al. 2023	Ocimum basilicum genotypes	S	56.82	9.09	154	mg phenols/100 g	Greenhosue
D8	Jafari and Shahsavar 2021	C. Aurantifolia Swingle	C	16.38	3.04	4	GAE, mg/g	Greenhouse
D8	Jafari and Shahsavar 2021	C. Aurantifolia Swingle	M	44.39	0.95	4	GAE, mg/g	Greenhouse
D8	Jafari and Shahsavar 2021	C. Aurantifolia Swingle	S	26.86	3.05	4	GAE, mg/g	Greenhouse
D8	Jafari and Shahsavar 2021	C. latifolia Tanaka	C	18.33	2.86	4	GAE, mg/g	Greenhouse
D8	Jafari and Shahsavar 2021	C. latifolia Tanaka	M	51.63	1.33	4	GAE, mg/g	Greenhouse
D8	Jafari and Shahsavar 2021	C. latifolia Tanaka	S	27.62	3.62	4	GAE, mg/g	Greenhouse
D10	Abdi et. al. 2019	Mentha × piperita L.	C	22.4	4.40908	6	μg GAE/ml)	Greenhouse
D10	Abdi et. al. 2019	Mentha × piperita L.	M	30.2	7.91185	6	μg GAE/ml)	Greenhouse
D10	Abdi et. al. 2019	Mentha × piperita L.	S	40.7	4.38459	6	μg GAE/ml)	Greenhouse
D17-Year 1	Mulugeta et. al 2023	O. basilicum	C	161.9	18.5329	3	mg/GAE dw	Greenhouse
D17-Year 1	Mulugeta et. al 2023	O. basilicum	M	128.3	28.0592	3	mg/GAE dw	Greenhouse
D17-Year 1	Mulugeta et. al 2023	O. basilicum	S	124.5	27.3664	3	mg/GAE dw	Greenhouse
D17-Year 2	Mulugeta et. al 2023	O. basilicum	C	111.9	34.1214	3	mg/GAE dw	Greenhouse
D17-Year 2	Mulugeta et. al 2023	O. basilicum	M	111.5	13.51	3	mg/GAE dw	Greenhouse
D17-Year 2	Mulugeta et. al 2023	O. basilicum	S	107.8	11.2583	3	mg/GAE dw	Greenhouse
D17-Year 1	Mulugeta et. al 2023	O. × africanum	C	115.3	34.2946	3	mg/GAE dw	Greenhouse
D17-Year 1	Mulugeta et. al 2023	O. × africanum	M	115.2	22.1703	3	mg/GAE dw	Greenhouse
D17-Year 1	Mulugeta et. al 2023	O. × africanum	S	114.8	18.1865	3	mg/GAE dw	Greenhouse
D17-Year 2	Mulugeta et. al 2023	O. × africanum	C	110	17.8401	3	mg/GAE dw	Greenhouse
D17-Year 2	Mulugeta et. al 2023	O. × africanum	M	114.4	24.5951	3	mg/GAE dw	Greenhouse
D17-Year 2	Mulugeta et. al 2023	O. × africanum	S	98.8	34.4678	3	mg/GAE dw	Greenhouse
D17-Year 1	Mulugeta et. al 2023	O. americanum	C	126.5	19.9186	3	mg/GAE dw	Greenhouse
D17-Year 1	Mulugeta et. al 2023	O. americanum	M	142.1	15.242	3	mg/GAE dw	Greenhouse
D17-Year 1	Mulugeta et. al 2023	O. americanum	S	167.9	41.9156	3	mg/GAE dw	Greenhouse
D17-Year 2	Mulugeta et. al 2023	O. americanum	C	132.7	29.9645	3	mg/GAE dw	Greenhouse
D17-Year 2	Mulugeta et. al 2023	O. americanum	M	207.4	25.2879	3	mg/GAE dw	Greenhouse
D17-Year 2	Mulugeta et. al 2023	O. americanum	S	182	37.0659	3	mg/GAE dw	Greenhouse
D19	Amiri et. al. 2016	Pelargonium graveolens L.	C	5.4	0.519615	3	mg GAE g−1 DW	Greenhouse
D19	Amiri et. al. 2016	Pelargonium graveolens L.	M	6.5	2.07846	3	mg GAE g−1 DW	Greenhouse
D19	Amiri et. al. 2016	Pelargonium graveolens L.	S	4.2	0.69282	3	mg GAE g−1 DW	Greenhouse
D20	BETTAIEB et. al. 2011	Cuminum cyminum L.	C	10.23	0.433013	3	mg GAE/g DW	Greenhouse
D20	BETTAIEB et. al. 2011	Cuminum cyminum L.	M	15.25	0.069282	3	mg GAE/g DW	Greenhouse
D20	BETTAIEB et. al. 2011	Cuminum cyminum L.	S	4.85	0.0173205	3	mg GAE/g DW	Greenhouse
D22	MULUGETA et. al. 2012	O. basilicum ’Ohre’	C	84.88	22.9103	2	mg GAE/g DM	Field
D22	MULUGETA et. al. 2012	O. basilicum ’Ohre’	M	60.04	16.2635	2	mg GAE/g DM	Field
D22	MULUGETA et. al. 2012	O. basilicum ‘Genovese’	C	76.4	15.1321	2	mg GAE/g DM	Field
D22	MULUGETA et. al. 2012	O. basilicum ‘Genovese’	M	92.53	24.1689	2	mg GAE/g DM	Field
D22	MULUGETA et. al. 2012	O. × africanum	C	28.53	4.97803	2	mg GAE/g DM	Field
D22	MULUGETA et. al. 2012	O. × africanum	M	39.92	11.4268	2	mg GAE/g DM	Field
D22	MULUGETA et. al. 2012	O. americanum	C	62.78	24.4942	2	mg GAE/g DM	Field
D22	MULUGETA et. al. 2012	O. americanum	M	67.33	18.7383	2	mg GAE/g DM	Field
D22	MULUGETA et. al. 2012	O. selloi	C	62.32	8.04688	2	mg GAE/g DM	Field
D22	MULUGETA et. al. 2012	O. selloi	M	73.94	14.128	2	mg GAE/g DM	Field
D22	MULUGETA et. al. 2012	O. sanctum ‘Krishna’	C	41.74	24.0416	2	mg GAE/g DM	Field
D22	MULUGETA et. al. 2012	O. sanctum ‘Krishna’	M	48.94	2.885	2	mg GAE/g DM	Field
D24	Bayat and Moghadam 2019	Salvia nemorosa L. Isfahan	C	3.5	0.391918	6	mg/g FW	Greenhouse
D24	Bayat and Moghadam 2019	Salvia nemorosa L. Isfahan	S	5.88	0.440908	6	mg/g FW	Greenhouse
D24	Bayat and Moghadam 2019	Salvia nemorosa L. Violet Queen	C	3.62	0.489898	6	mg/g FW	Greenhouse
D24	Bayat and Moghadam 2019	Salvia nemorosa L. Violet Queen	S	5.73	0.612372	6	mg/g FW	Greenhouse
D24	Bayat and Moghadam 2019	Salvia nemorosa L. Rose Queen	C	3.57	0.342929	6	mg/g FW	Greenhouse
D24	Bayat and Moghadam 2019	Salvia nemorosa L. Rose Queen	S	3.82	0.318434	6	mg/g FW	Greenhouse
D33	Bettaieb et. al. 2011	Salvia officinalis L.	C	2.01	0.299645	3	GAE g/DW	Greenhosue
D33	Bettaieb et. al. 2011	Salvia officinalis L.	M	8.27	0.446869	3	GAE g/DW	Greenhosue
D33	Bettaieb et. al. 2011	Salvia officinalis L.	S	6.49	0.595825	3	GAE g/DW	Greenhosue
D35	Habibi 2024	Aloe Vera L.	C	2.43	0.681651	8	GAE g/DW	Greenhosue
D35	Habibi 2024	Aloe Vera L.	M	2.61	0.291328	8	GAE g/DW	Greenhosue
D35	Habibi 2024	Aloe Vera L.	S	2.53	1.56129	8	GAE g/DW	Greenhosue
D37	Talbia et. al. 2020	Oudeneya africana	C	8.09	0.636867	6	GAE g/DW	Greenhosue
D37	Talbia et. al. 2020	Oudeneya africana	M	22.91	0.661362	6	GAE g/DW	Greenhosue
D37	Talbia et. al. 2020	Oudeneya africana	S	27.51	2.69444	6	GAE g/DW	Greenhosue

## Sheet: Proline
Ref No #	Reference	Plant Species	Stress Level	Mean	SD	N	Unit	Field/Pot
D2	Rahimi et. al. 2022	Thymus vulgaris L.	C	2.1	0.41396	3	ug/g	Field
D2	Rahimi et. al. 2022	Thymus vulgaris L.	S	3.9	0.275396	3	ug/g	Field
D7	Rahimi et. al. 2023	Ocimum basilicum genotypes	C	0.32	0.18	154	x	Greenhouse
D7	Rahimi et. al. 2023	Ocimum basilicum genotypes	M	0.51	0.22	154	x	Greenhouse
D7	Rahimi et. al. 2023	Ocimum basilicum genotypes	S	0.73	0.36	154	x	Greenhouse
D11	Karimi et. al. 2020	Salvia officinalis L.	C	24.03	11.42	4	mg/g– fr. wt.	Greenhouse
D11	Karimi et. al. 2020	Salvia officinalis L.	M	34.67	13.28	4	mg/g– fr. wt.	Greenhouse
D11	Karimi et. al. 2020	Salvia officinalis L.	S	33.33	8.02	4	mg/g– fr. wt.	Greenhouse
D15	Imani et. al. 2023	Salvia Miryazanii	C	9.61	0.788083	3	mg/g fw	Greenhouse
D15	Imani et. al. 2023	Salvia Miryazanii	M	20	1.78401	3	mg/g fw	Greenhouse
D15	Imani et. al. 2023	Salvia Miryazanii	S	29.46	2.5721	3	mg/g fw	Greenhouse
D19	Amiri et. al. 2016	Pelargonium graveolens L.	C	2.63	1.90526	3	μmol g/ DW	Greenhouse
D19	Amiri et. al. 2016	Pelargonium graveolens L.	M	4.24	0.866025	3	μmol/g DW	Greenhouse
D19	Amiri et. al. 2016	Pelargonium graveolens L.	S	5.23	1.55885	3	μmol/g DW	Greenhouse
D30	Mohammadi et. al. 2018	Thymus vulgaris	C	7.746	0.32909	3	μmol g/ DW	Field
D30	Mohammadi et. al. 2018	Thymus vulgaris	M	18.817	1.2644	3	μmol/g DW	Field
D31-Year 1	Bistgani et. al. 2017	Thymus daenensis	C	1.8	1.61081	3	μmol g−1	Field
D31-Year 1	Bistgani et. al. 2017	Thymus daenensis	M	2.5	1.55885	3	μmol g−1	Field
D31-Year 1	Bistgani et. al. 2017	Thymus daenensis	S	3.85	1.57617	3	μmol g−1	Field
D31-Year 2	Bistgani et. al. 2017	Thymus daenensis	C	2.38	0.866025	3	μmol g−1	Field
D31-Year 2	Bistgani et. al. 2017	Thymus daenensis	M	3.08	1.03923	3	μmol g−1	Field
D31-Year 2	Bistgani et. al. 2017	Thymus daenensis	S	3.26	1.55885	3	μmol g−1	Field
D34	Torun et. al. 2021	Hypericum perforatum L.	C	1.81	0.543787	6	μmol g−1	Greenhouse
D34	Torun et. al. 2021	Hypericum perforatum L.	M	46.5	4.3356	6	μmol g−1	Greenhouse
D35	Habibi 2024	Aloe Vera L.	C	3.53	1.49907	8	mg/g FW	Greenhosue
D35	Habibi 2024	Aloe Vera L.	M	5.33	1.92333	8	mg/g FW	Greenhosue
D35	Habibi 2024	Aloe Vera L.	S	2.86	2.43245	8	mg/g FW	Greenhosue
